# Supplementary material
Source: Springer Nature journal article supplement (https://www.springerprofessional.de/resource/supplementary/40095_2012_29_MOESM5_ESM.pdf/11899664)

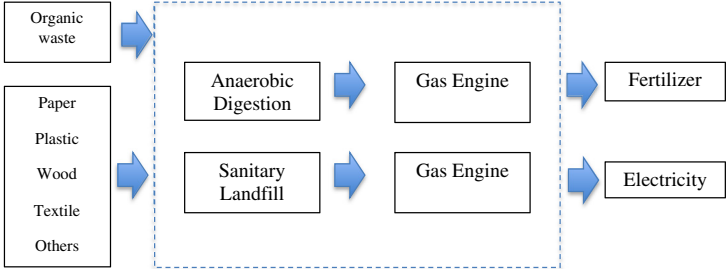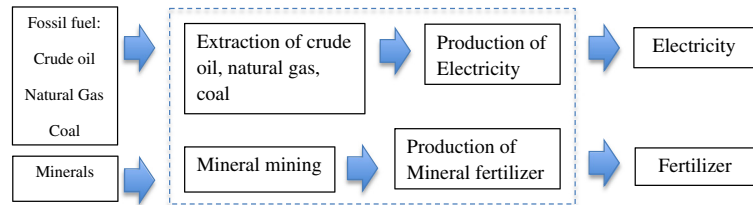

Supplement: MOESM5 [file 11899664]
